# Supplementary material
Source: PubMed Central journal article supplement (PMC5828011)
Supplement: NIHMS943077-supplement-si.pdf [file NIHMS943077-supplement-si.pdf]

## **SUPPORTING INFORMATION**

### **Multidimensional control of Cas9 by evolved RNA polymerase-based biosensors**

Jinyue Pu<sup>1</sup>, Kaitlin Kentala<sup>1</sup>, Bryan C. Dickinson<sup>1\*</sup>

<sup>1</sup>Department of Chemistry, The University of Chicago, Chicago, IL 60637,

\*Corresponding author. Email address: [Dickinson@uchicago.edu](mailto:Dickinson@uchicago.edu) (Bryan C. Dickinson)

**Table S1 | List of plasmids used in this work.**

| <b>Vector name</b> | <b>Antibiotic resistance</b> | <b>Origin</b> | <b>Purpose</b>                                                                                                        | <b>Map</b> |
|--------------------|------------------------------|---------------|-----------------------------------------------------------------------------------------------------------------------|------------|
| p2-22              | carb                         | sc101         | P <sub>T7</sub> luciferase reporter plasmid                                                                           | a          |
| p3-7               | spec                         | P15A          | T7 RNAP <sub>N</sub> (wt)-linker-ZA expression plasmid                                                                | b          |
| p2-55              | chl <sub>r</sub>             | CloDF13       | T7 RNAP <sub>C</sub> expression plasmid                                                                               | c          |
| p2-39              | chl <sub>r</sub>             | CloDF13       | ZB-linker-T7 RNAP <sub>C</sub> expression plasmid                                                                     | d          |
| p5-74              | spec                         | P15A          | T7 RNAP <sub>N</sub> (N-29-1)-linker-ZA (L13I, L20I) expression plasmid                                               | b          |
| p8-15              | spec                         | P15A          | T7 RNAP <sub>N</sub> (N-29-1)-linker-ABI expression plasmid                                                           | e          |
| p8-17              | chl <sub>r</sub>             | CloDF13       | PYL-linker-T7 RNAP <sub>C</sub> expression plasmid                                                                    | f          |
| pJin 274           | kan                          | pBR322        | P <sub>T7</sub> -GFP mRNA expression, PYL-linker-T7 RNAP <sub>C</sub> , T7 RNAP <sub>N</sub> (d5-14)-linker-ABI       | g          |
| pJin 278           | kan                          | pBR322        | P <sub>T7</sub> -GFP mRNA expression, PYL-linker-T7 RNAP <sub>C</sub> , T7 RNAP <sub>N</sub> (d5-19)-linker-ABI       | g          |
| pJin 286           | kan                          | pBR322        | P <sub>T7</sub> -GFP mRNA expression, PYL-linker-T7 RNAP <sub>C</sub> , T7 RNAP <sub>N</sub> (N-29-1)-linker-ABI      | g          |
| pJin 287           | kan                          | pBR322        | P <sub>T7</sub> -GFP mRNA expression, PYL-linker-T7 RNAP <sub>C</sub> , T7 RNAP <sub>N</sub> (d5-6)-linker-ABI        | g          |
| pJin 288           | kan                          | pBR322        | P <sub>T7</sub> -GFP mRNA expression, PYL-linker-T7 RNAP <sub>C</sub> , T7 RNAP <sub>N</sub> (d5-13)-linker-ABI       | g          |
| pJin 239           | kan                          | pBR322        | pT7-gRNA GFP expression, PYL-linker-T7 RNAP <sub>C</sub> , T7 RNAP <sub>N</sub> (N-29-1)-linker-ABI                   | h          |
| pJin 264           | kan                          | pBR322        | P <sub>T7</sub> -gRNA GFP expression, PYL-linker-T7 RNAP <sub>C</sub> , T7 RNAP <sub>N</sub> (d5-19)-linker-ABI       | h          |
| pJin 272           | kan                          | pBR322        | P <sub>T7</sub> -gRNA GFP expression, PYL-linker-T7 RNAP <sub>C</sub> , T7 RNAP <sub>N</sub> (d5-13)-linker-ABI       | h          |
| pJin 263           | kan                          | pBR322        | P <sub>T7</sub> -gRNA GFP expression, PYL-linker-T7 RNAP <sub>C</sub> , T7 RNAP <sub>N</sub> (d5-14)-linker-ABI       | h          |
| pJin 290           | kan                          | pBR322        | P <sub>CGG</sub> -gRNA GFP-off expression, FKBP-linker-T7 RNAP <sub>C</sub> , T7 RNAP <sub>N</sub> (d5-19)-linker-FRB | i          |
| pJin 310           | kan                          | pBR322        | P <sub>T7</sub> -gRNA GFP expression, Bcl-2-linker-T7 RNAP <sub>C</sub>                                               | j          |
| p12-34             | kan                          | pBR322        | T7 RNAP <sub>N</sub> (d5-19)-linker-tBID mammalian expression plasmid                                                 | k          |
| p12-33             | kan                          | pBR322        | T7 RNAP <sub>N</sub> (d5-19)-linker-dBID mammalian expression plasmid                                                 | k          |
| pJin 178           | carb                         | sc101         | Positive AP (RBS1 – SD8, RBS2 – sd6)                                                                                  | l          |
| pJin 179           | carb                         | sc101         | Positive AP (RBS1 – SD8, RBS2 – sd5)                                                                                  | l          |
| pJin 179           | kan                          | pBR322        | Negative AP (RBS3 – SD4, RBS4 – sd6)                                                                                  | m          |
| p9-18              | carb                         | CloE1         | <i>Staphylococcus aureus</i> Cas9 expression vector                                                                   | n          |
| p5-54              | carb                         | CloE1         | P <sub>U6</sub> driven gRNA GFP expression vector                                                                     | o          |
| P3-62              | kan                          | pUC           | P <sub>CMV</sub> -driven RFP expression vector                                                                        | p          |

**Table S2 | ABA-induced gRNA production from pJin 264.** HEK293T cells transfected with pJin 278 (**Figure 1D**, variant d5-19). During transfection, the cells were treated with 0, 1, 10, or 100  $\mu$ M ABA. After 40 h of growth, the cells were lysed, total RNA isolated, and the levels of gRNA production analyzed by RT-qPCR. Ct values shown. GAPDH RNA levels analyzed as a control for RNA isolation.

| [ABA]  | 0     | 1 $\mu$ M | 10 $\mu$ M | 100 $\mu$ M |
|--------|-------|-----------|------------|-------------|
| GAPDH  | 20.29 | 20.22     | 20.31      | 20.17       |
| gRNA-1 | 21.12 | 16.6      | 16.72      | 16.61       |

**Table S3 | Concentration-dependence of ABT199.** HEK293T cells transfected with pJin 310 and p12-34 (**Figure 3A**). During transfection, the cells were treated with 0, 50, 250, 500 or 1,000 nM ABT199. After 40 h of growth, the cells were lysed, total RNA isolated, and the levels of gRNA production was analyzed by RT-qPCR. Ct values shown. GAPDH RNA levels analyzed as a control for RNA isolation.

| [ABT-199] | 0     | 50 nM | 250 nM | 500 nM | 1,000 nM |
|-----------|-------|-------|--------|--------|----------|
| GAPDH     | 19.95 | 19.67 | 20.06  | 19.88  | 19.94    |
| gRNA-1    | 20.12 | 22.89 | 22.7   | 21.99  | 23.11    |

**Table S4 | saCas9 gRNA and RT-qPCR primer sequences.**

| <b>Name</b>            | <b>DNA or oligo sequences</b>                                                                                             |
|------------------------|---------------------------------------------------------------------------------------------------------------------------|
| gRNA-1<br>(GFP)        | GCCCTCGAACTTCACCTCGGCGTTTTAGTACTCTGTAATGAAAATTA<br>CAGAATCTACTAAAACAAGGCAAAATGCCGTGTTTATCTCGTCAAC<br>TTGTTGGCGAGATTTTTTTT |
| gRNA-2<br>(off switch) | AGTTCGAGGGCTCTCCCTATAGTTTTAGTACTCTGTAATGAAAATTA<br>CAGAATCTACTAAAACAAGGCAAAATGCCGTGTTTATCTCGTCAAC<br>TTGTTGGCGAGATTTTTTTT |
| gRNA-1-for             | CCTCGAACTTCACCTCGGCGT                                                                                                     |
| gRNA-2-for             | AGTTCGAGGGCTCTCCCTATAGT                                                                                                   |
| gRNA-rev               | CTCGCCAACAAGTTGACGAGATAAACAC                                                                                              |
| GAPDH-for              | TGCACCACCAACTGCTTAGC                                                                                                      |
| GAPDH-rev              | GGCATGGACTGTGGTCATGAG                                                                                                     |

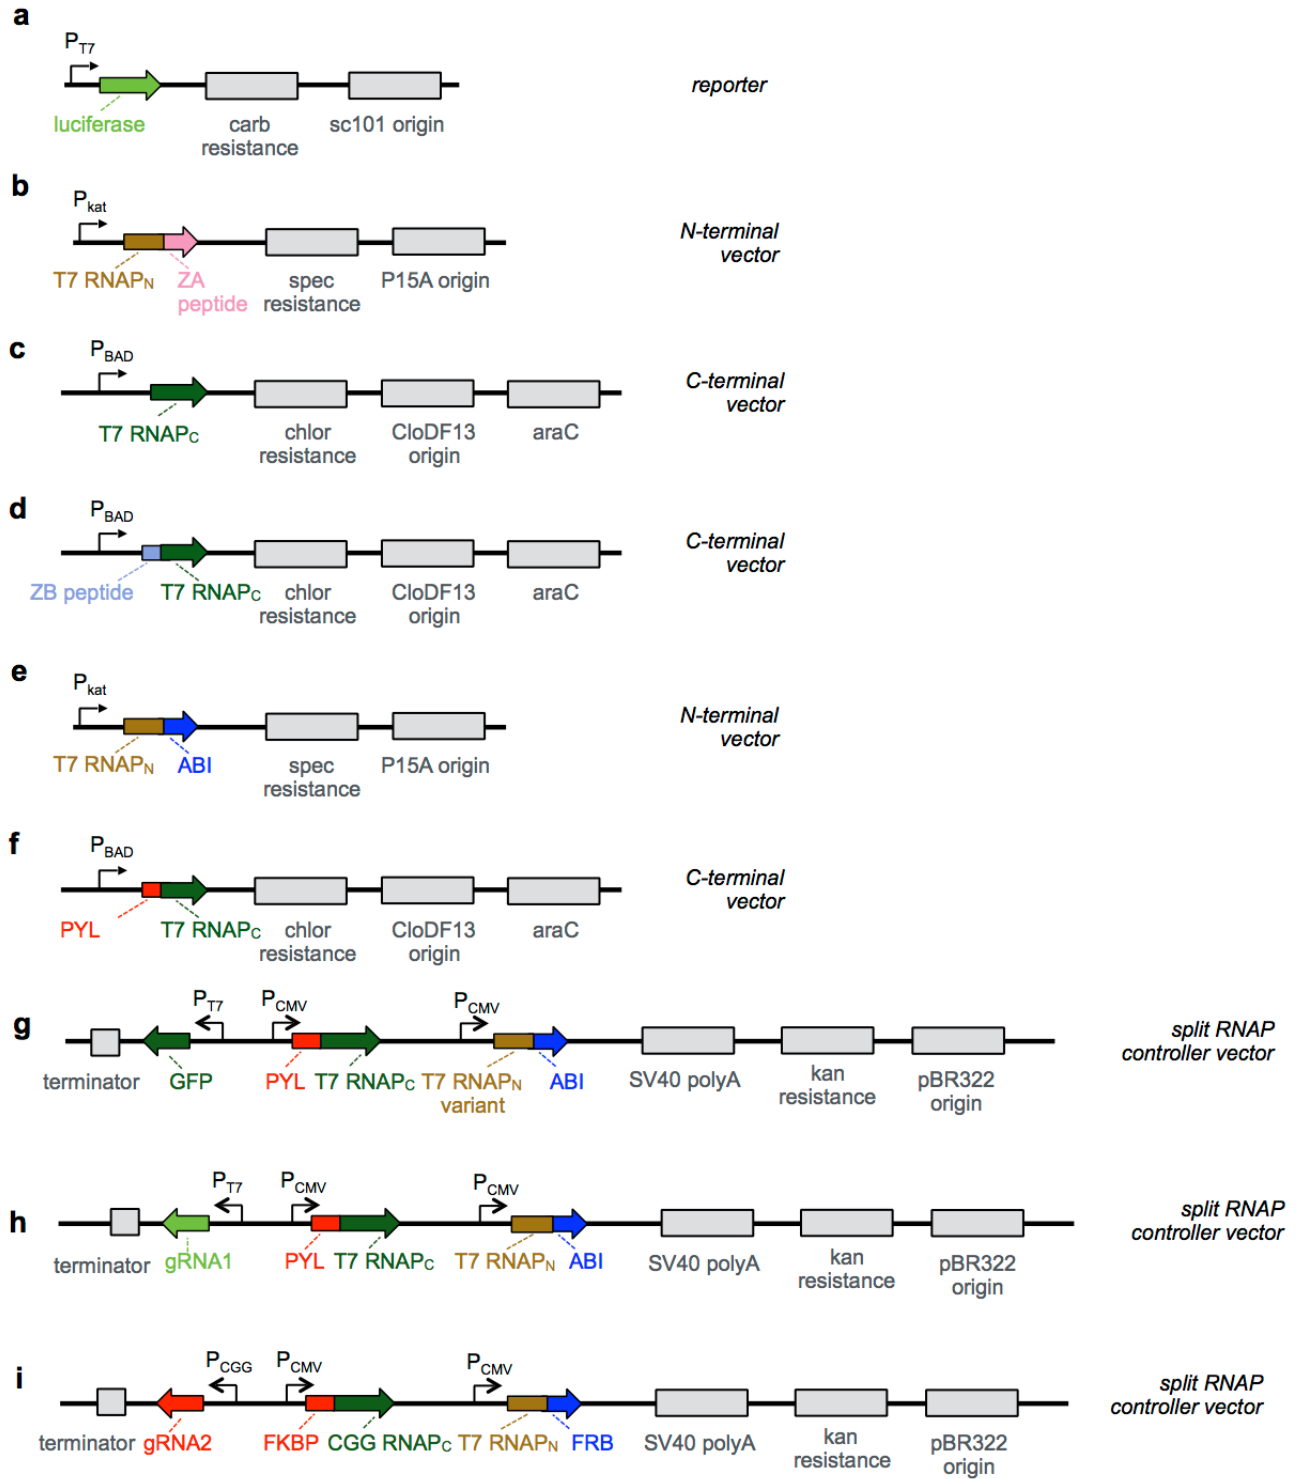

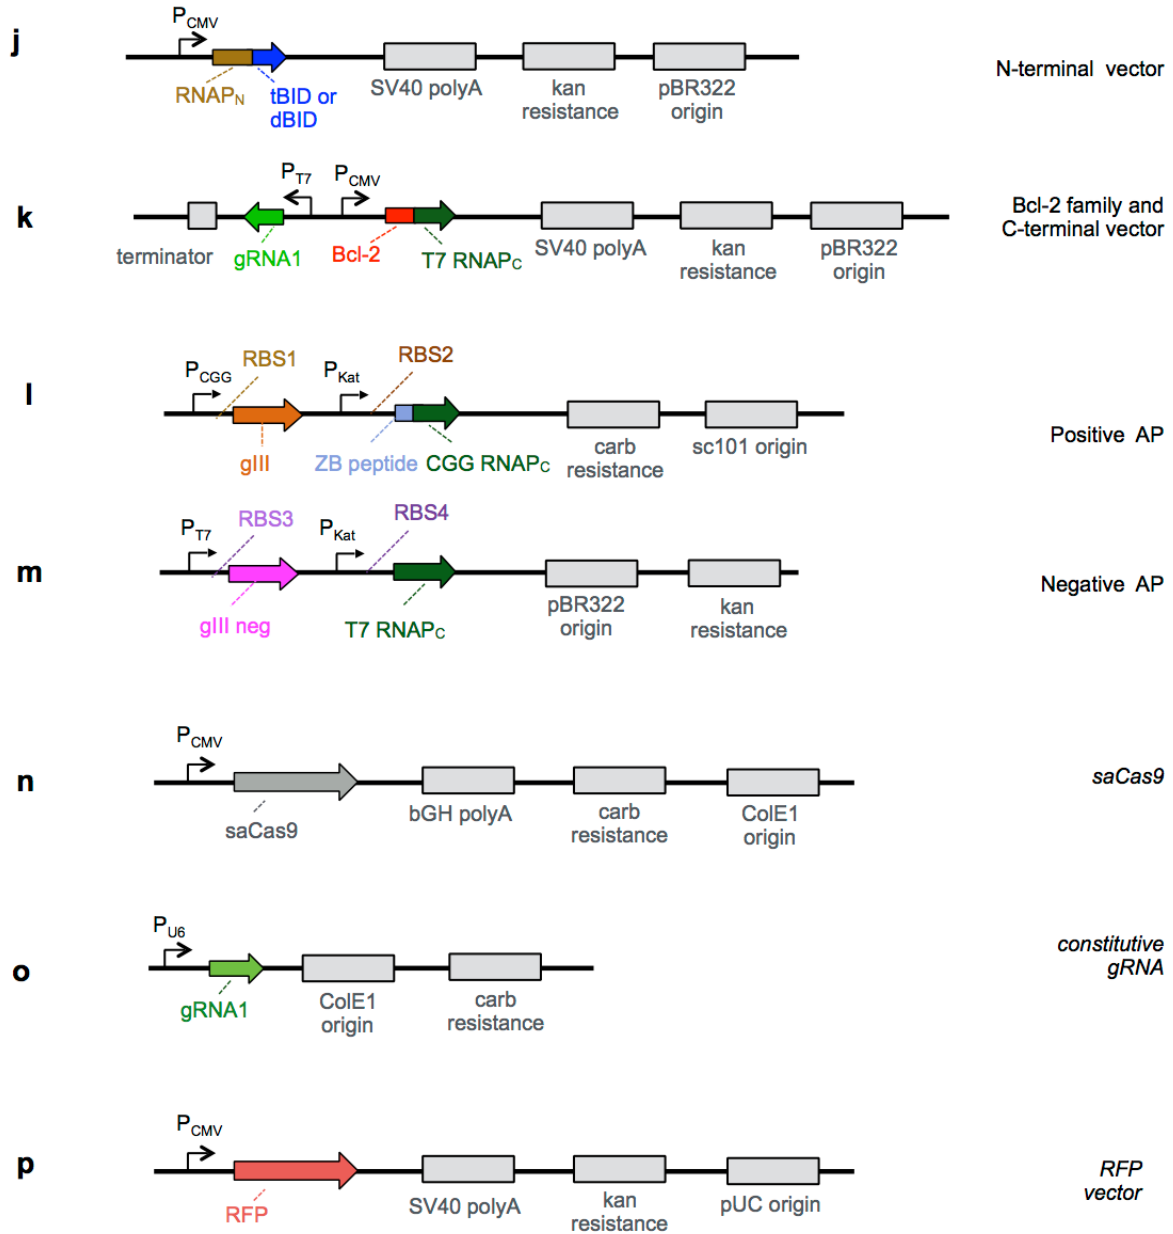

**Figure S1 | Vector maps for all constructs used in this work.** Vector maps corresponding to the vectors listed in **Table S1** shown.

| evolutionary date | positive AP |     |        |      |      | negative AP |     |        |      |      |
|-------------------|-------------|-----|--------|------|------|-------------|-----|--------|------|------|
|                   | Vector name | Map | origin | RBS1 | RBS2 | Vector name | Map | origin | RBS3 | RBS4 |
| day1              | pJin178     | l   | sc101  | SD8  | sd6  | pJin153     | m   | pBR322 | SD4  | sd6  |
| day2              | pJin178     | l   | sc101  | SD8  | sd6  | pJin153     | m   | pBR322 | SD4  | sd6  |
| day3              | pJin178     | l   | sc101  | SD8  | sd6  | pJin153     | m   | pBR322 | SD4  | sd6  |
| day4              | pJin178     | l   | sc101  | SD8  | sd6  | pJin153     | m   | pBR322 | SD4  | sd6  |
|                   | pJin179     | l   | sc101  | SD8  | sd5  | pJin153     | m   | pBR322 | SD4  | sd6  |
| day5              | pJin179     | l   | sc101  | SD8  | sd5  | pJin153     | m   | pBR322 | SD4  | sd6  |

**Figure S2 | Evolutionary protocol for PACE experiment.** Vector names and details are provided for each day of PACE. Vector maps for the posAP and negAP vectors are shown in **Figure S1**, l and m. Two sets of posAP/negAP vectors listed on the same day indicates that a mixed selection pressure was utilized, in which two types of host cells, each containing one set of the posAP/negAP plasmids were added to a lagoon simultaneously. The relative RBS strengths were obtained from previous studies.<sup>1</sup>



|       |      |      |           |      |          |      |      |      |             |             |             |
|-------|------|------|-----------|------|----------|------|------|------|-------------|-------------|-------------|
| day3  |      |      |           |      |          |      |      |      |             |             |             |
| d3-1  |      | L32S | E35G      | R57C | E63K     |      |      | K98R | Q107K       | T122S       | A144T       |
| d3-2  |      | L32S | E35G      |      | E63K     |      |      | K98R | Q107K       | T122S       | A144T       |
| d3-4  |      | L32S | E35G      | R57Y | E63K     |      |      | K98R | Q107K       | T122S       | A144T       |
| d3-5  |      | L32S | E35G      | R57C | E63K     |      |      | K98R | Q107K       | T122S       | A144T       |
| d3-7  |      | L32S | E35G      | R57C | E63K     |      |      | K98R | Q107K       | T122S       | A144T       |
| d3-8  |      | L32S | E35G      |      | E63K     |      |      | K98R | Q107K       | T122S       | A144T       |
| d3-9  |      | L32S | E35G      |      | E63K     |      |      | K98R | Q107K       | T122S       | A144T       |
| d3-10 |      | L32S | E35G      | R57C | E63K     |      |      | K98R | Q107K       | T122S       | T127A A144T |
| d3-11 |      | L32S | E35G      |      | E63K     |      |      | K98R | Q107K       | T122S       | A136S A144T |
| d3-12 |      | L32S | E35G      |      | E63K     |      |      | K98R | Q107K       | T122S       | A136S A144T |
| d3-14 |      | L32S | E35G      |      | E63K     |      |      | K98R | Q107K       | T122S       | A144T       |
| d3-15 |      | L32S | E35G      | R57C | E63K     |      |      | K98R | Q107K       | T122S       | T127A A144T |
| d3-16 |      | L32S | E35G      |      | E63K     |      |      | K98R | Q107K       | T122S       | A144T       |
| day5  |      |      |           |      |          |      |      |      |             |             |             |
| d5-1  |      | L32S | E35G      | R57C | E63K     | N67T |      | K98R | Q107K       | T122S       | A144T       |
| d5-2  |      | L32S | E35G      | R57C | E63K     | N67T | T76S | R96S | K98R        | Q107K       | T122S A144T |
| d5-3  |      | L32S | E35G      | R57C | A61 E63K | N67T | L77I |      | K98R        | Q107K       | T122S A144T |
| d5-4  |      | L32S | E35G      | R57C | E63K     |      |      | K98R | Q107K       | T122S       | L123M A144T |
| d5-5  | D26Y | L32S | E35G      | M46I | R57C     | E63K |      | K98R | Q107K       | T122S       | A144T       |
| d5-6  |      | L32S | E35G      | R57C | E63K     |      |      | K98R | Q107K       | K120N T122S | V134I A144T |
| d5-8  |      | L32S | E35G      | R57C | E63K     | N67  |      | K98R | Q107K       | T122S       | A144T       |
| d5-9  |      | L32S | E35G      | R57C | E63K     |      |      | K98R | Q107K       | T122S       | A144T       |
| d5-10 |      | L32S | E35G      | R57C | E63K     |      |      | K98R | Q107K       | T122S       | A144T       |
| d5-12 |      | L32S | E35G      | R57C | E63K     |      |      | K98R | Q107K       | T122S       | A144T       |
| d5-13 |      | L32S | A33T E35G | R57C | E63K     |      |      | K98R | Q107K       | T122S       | A144T A159S |
| d5-14 | L24R | L32S | E35G      | R57C | E63K     |      |      | K98R | Q107K       | T122S       | A144T       |
| d5-15 | D26Y | L32S | E35G      | R57C | E63K     |      |      | K98R | Q107K       | T122S       | A144T       |
| d5-16 |      | L32S | E35G      | R57C | E63K     |      |      | K98R | Q107K       | T122S       | A144T       |
| d5-18 | L24R | L32S | E35G      | R57C | E63K     |      |      | K98R | Q104K Q107K | T122S       | A144T       |
| d5-19 | F21L | L32S | E35G      | R57C | E63K     |      |      | K98R | Q104K Q107K | T122S       | A144T       |

**Figure S3 | Mutational analysis of evolving split RNAP.** Single phage sequenced during the course of the PACE experiment and coding mutations are shown for a set of variants assayed at each time point. The final variant selected for further assay (d5-19) is highlighted yellow.

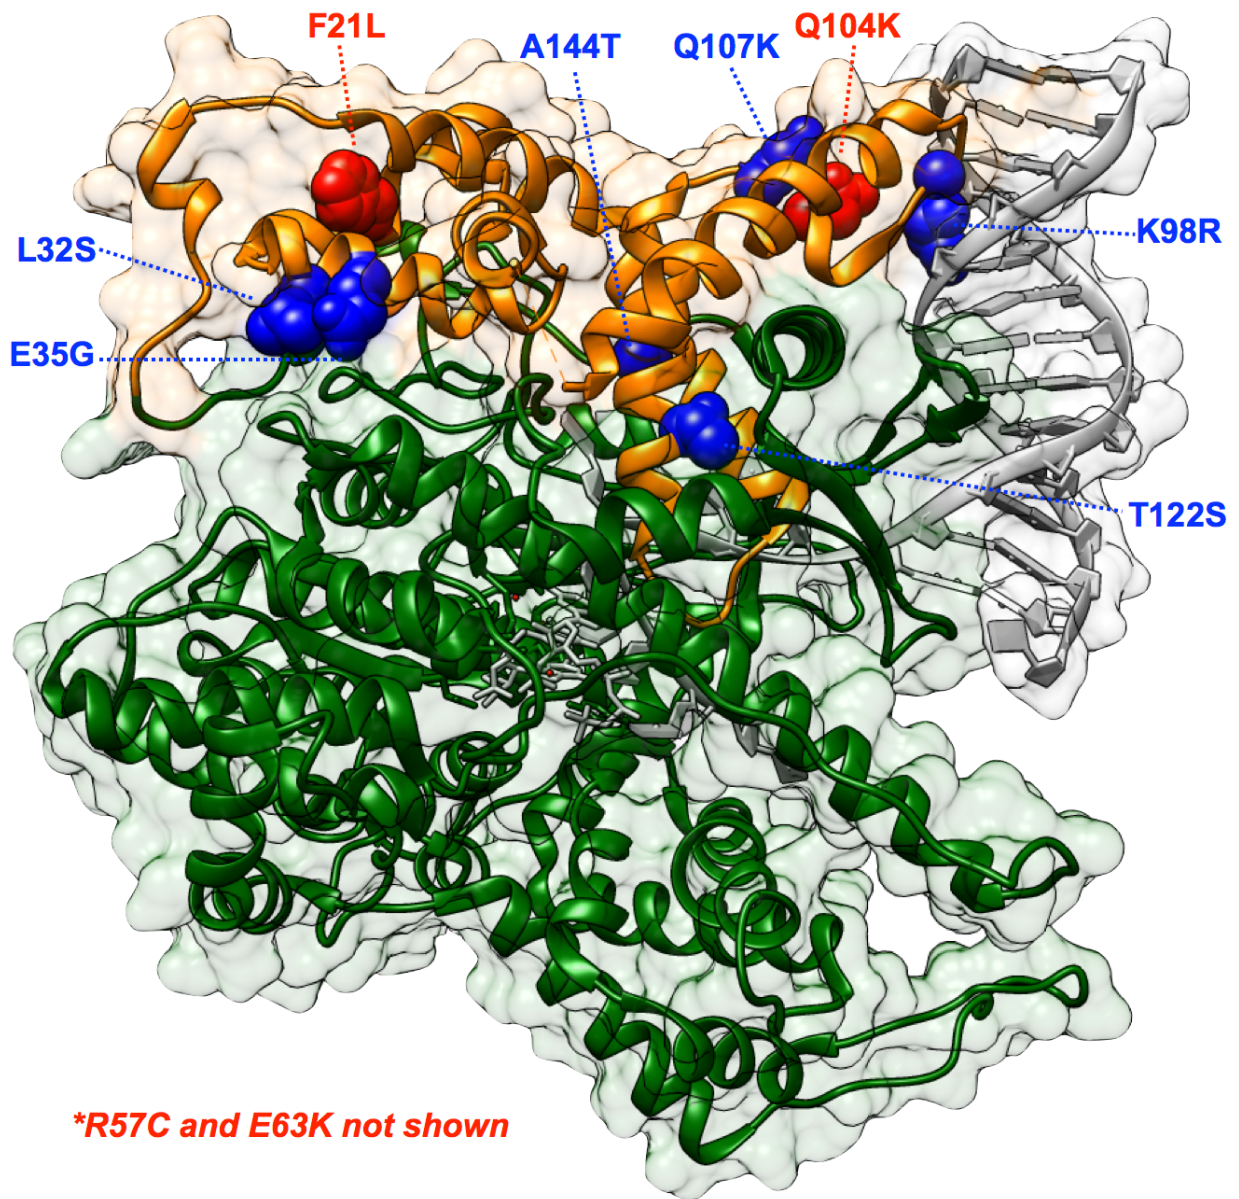

**Figure S4 | Mutations from d5-19 variant mapped onto the T7 RNAP initiation complex crystal structure.** Mutations and split site mapped onto T7 RNAP crystal structure. RNAP<sub>N</sub> shown in orange and RNAP<sub>C</sub> shown in green. Mutations from previous evolution (N-29-1) shown in blue and new mutations from d5-19 shown in red. Mutations in regions of the protein that do not show up in the structure omitted. (PDB 1QLN<sup>2</sup>).

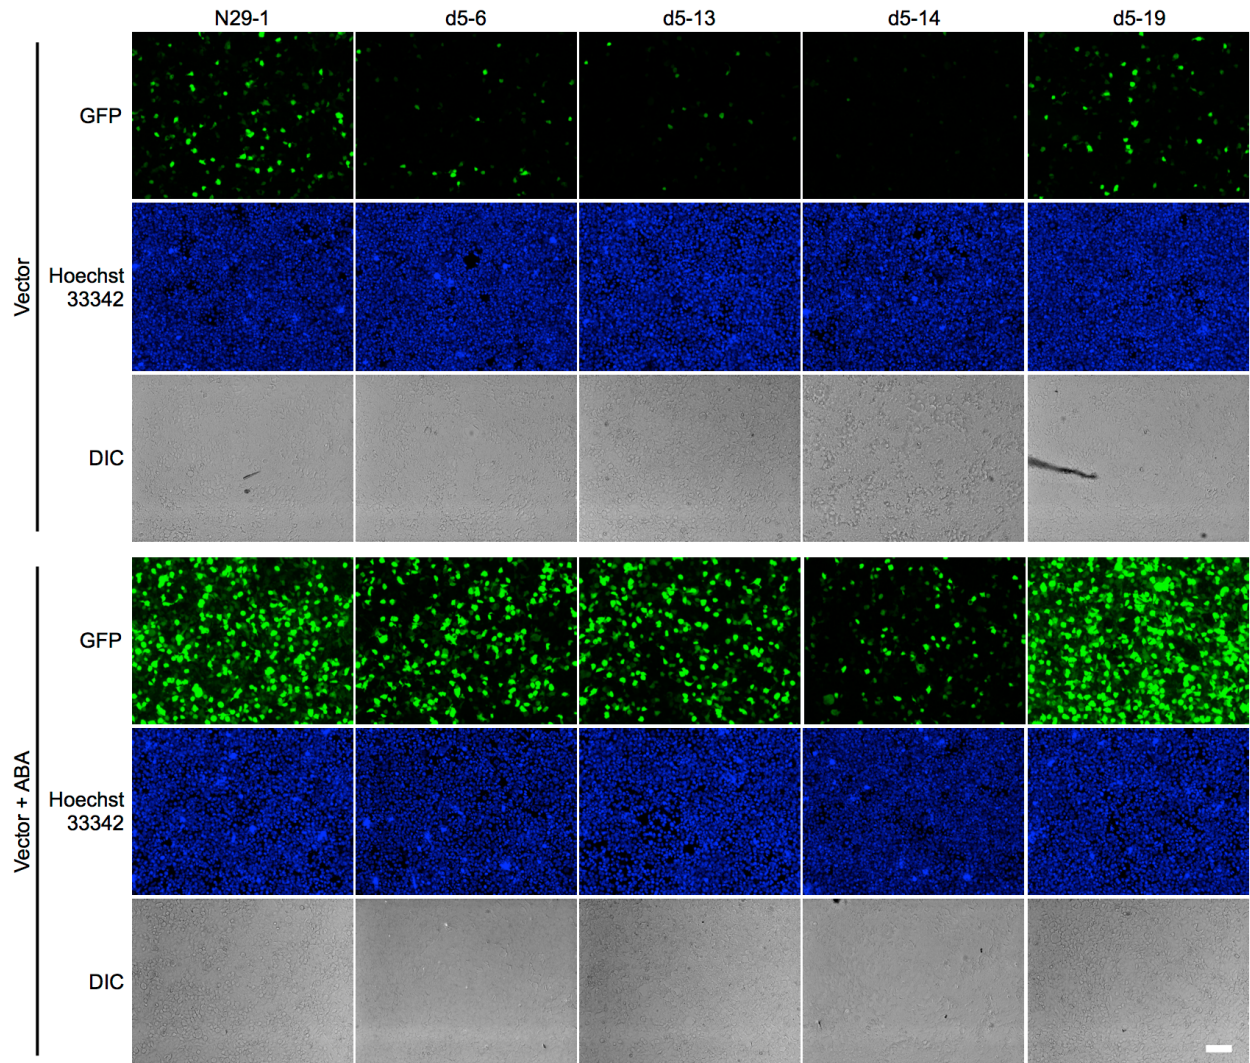

**Figure S5 | Complete imaging series of Figure 2E.** HEK293T cells transfected with the plasmids shown in Figure 2D. 7 h after transfection, the cells were treated with either nothing or 10  $\mu$ M ABA. After an additional 23 h of growth, the cells were loaded with 1  $\mu$ M Hoechst 33342 and analyzed by fluorescence microscopy. 100  $\mu$ m scale bar shown.

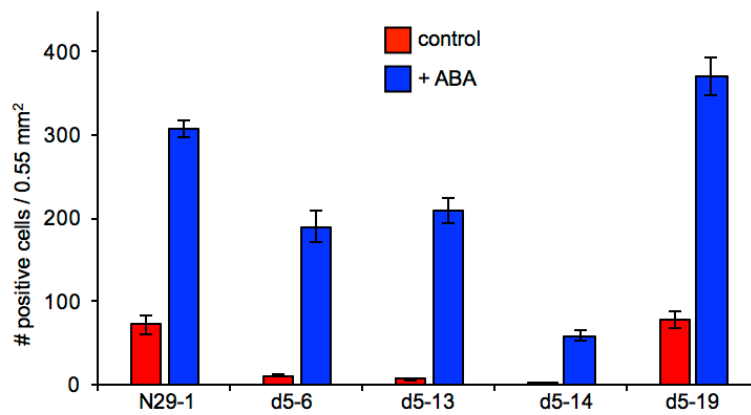

**Figure S6 | Quantification of experiment shown in Figure 2E and S5. Error bars are  $\pm$  SEM,  $n = 5$ .**



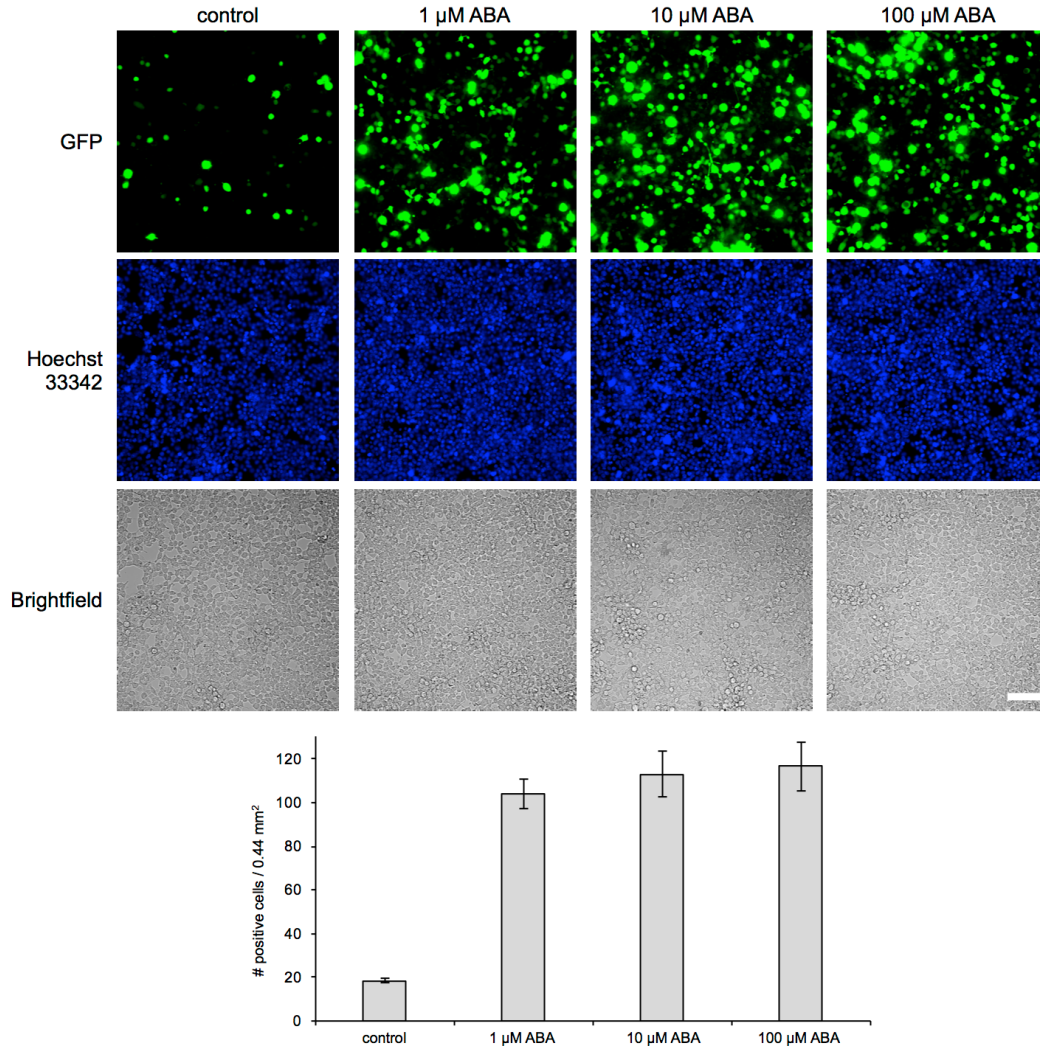

**Figure S7 | Dose response to ABA.** HEK293T cells transfected with pJin 278. During transfection, the cells were treated with 0, 1, 10, or 100  $\mu\text{M}$  ABA. After 46 h of growth, the cells were loaded with 1  $\mu\text{M}$  Hoechst 33342 and analyzed by fluorescence microscopy. 100  $\mu\text{m}$  scale bar shown. For quantification of imaging, error bars are  $\pm$  SEM,  $n = 4$ .

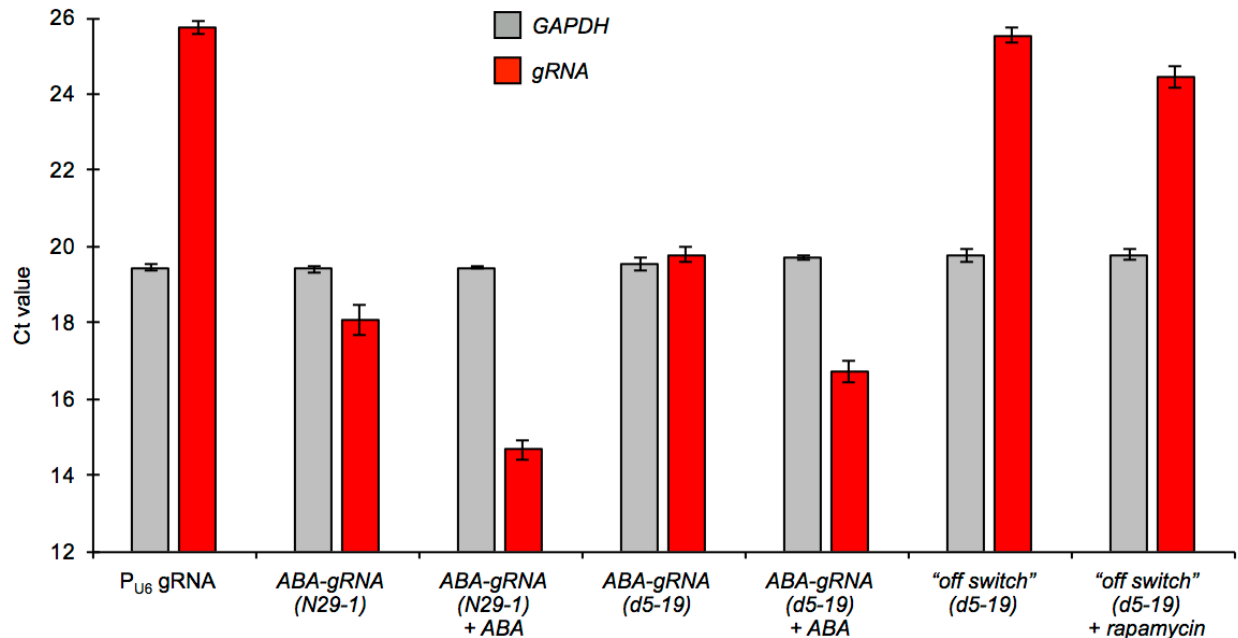

**Figure S8 | Analysis of amount of gRNA produced by split RNAP vectors compared to constitutive gRNA vectors.** HEK293T cells transfected with either a P<sub>U6</sub>-driven gRNA vector (p5-54), the N-29-1 ABA-inducible vector shown in **Figure 1D** (pJin 239), the “on switch” d5-19 ABA-inducible vector shown in **Figure 4A** (pJin 264), or the rapamycin-inducible “off switch” vector shown in **Figure 4A** (pJin 290). 15 h after transfection, the cells were treated with DMSO control, 10  $\mu$ M ABA, or 10 nM rapamycin. 26 h after treatment, total RNA was collected from the cells and the amount of gRNA was analyzed by RT-qPCR. GAPDH was also analyzed as a control for RNA isolation. As seen in the plot, both the N-29-1 and d5-19 produce more gRNA than the constitutive P<sub>U6</sub>-driven vector, even though they display lower background and lower levels of target knockout. Additionally, the rapamycin-inducible vector shows a very low background of gRNA production, but also modest rapamycin-induced gRNA production, providing an explanation as to why the “off switch” vector did not completely block the Cas9 response. This is possibly due to the diminished activity of the CGG-RNAP<sub>C</sub> variant. Error bars are  $\pm$  SEM, n = 3.

## References

1. Ringquist, S., Shinedling, S., Barrick, D., Green, L., Binkley, J., Stormo, G. D., and Gold, L. (1992) Translation initiation in *Escherichia coli*: sequences within the ribosome-binding site, *Mol. Microbiol.* 6, 1219-1229.
2. Cheetham, G. M., and Steitz, T. A. (1999) Structure of a transcribing T7 RNA polymerase initiation complex, *Science* 286, 2305-2309.
